# Supplementary material for: Prevalence, Staging, and Factors Associated With Rheumatic Heart Disease Among Primary School Children, in Mwanza, Tanzania
Source: Research Square preprint supplement (doi:10.21203/rs.3.rs-8339488/v1), 2026-01-13
Supplement: Supplementary file 1 [file 383ebdd1a9609e4dbd8c408f.docx]

**ECHOCARDIOGRAPHY EXAMINATION ( QUESTIONNAIRE)**

| **S/NO** | **CODE** | **QUESTION** | **FINDINGS** | **CODE RESPONSE** |
| --- | --- | --- | --- | --- |
| **SCREENING ECHOCARDIOGRAM** | | | | |
| 5 | MR (requires all the following) | 1. For body weight <30 kg: MR jet length ≥ 1.5 cm **OR** body weight ≥ 30 kg: MR jet length ≥ 2.0 cm | NO | 0 |
| YES | 1 |
| 1. MR jet observed in at least one view | NO | 0 |
| YES | 1 |
| 1. MR jet is observed in at least two consecutive frames | NO | 0 |
| YES | 1 |
| 6 | AR (requires all the following) | 1. AR in at least one view | NO | 0 |
| YES | 1 |
| 1. AR in at least two consecutive frames | NO | 0 |
| YES | 1 |
| 7 | Mitral stenosis | Restricted leaflet motion with reduced valve opening | NO | 0 |
| YES | 1 |
| 8 | Negative screen | If NO in number 5A,Band C, OR 6A and B, OR 7 | 0 | |
| Positive screen | If YES in number 5A, B and C, OR 6A and B, OR 7 | 1 | |
| **CONFIRMATORY ECHOCARDIOGRAPHY** | | | | |
| 9 | Pathological (at least mild) MR (all criteria must be met) | Observed in at least two views | NO | 0 |
| YES | 1 |
| Observed in at least one view  For body weight <30 kg: MR jet length ≥ 1.5 cm **OR** body weight ≥ 30 kg: MR jet length ≥ 2.0 cm | NO | 0 |
| YES | 1 |
| Velocity ≥ 3.0 m/s for one complete envelope | NO | 0 |
| YES | 1 |
| Pan-systolic jet in at least one envelope | NO | 0 |
| YES | 1 |
| 10 | Pathological (at least mild) AR (all criteria must be met) | Observed in at least two views | NO | 0 |
| YES | 1 |
| Observed in at least one view, AR jet length ≥ 1.0 cm | NO | 0 |
| YES | 1 |
| Velocity ≥ 3.0 m/s in early diastole | NO | 0 |
| YES | 1 |
| Pan-diastolic jet in at least  one enveloped | NO | 0 |
| YES | 1 |
| 11 | Mitral stenosis (all criteria must be met) | Restricted leaflet motion with reduced valve opening | NO | 0 |
| YES | 1 |
| Mean peak gradient ≥ 4.0 mmHg | NO | 0 |
| YES | 1 |
| 12 | **Morphological characteristics of the mitral valve**  Valve apparatus thickening (defined by the presence of either or both): - | Anterior leaflet thickening | NO | 0 |
| Chordal thickening | YES | 1 |
| **Morphological characteristics of the mitral valve**  Valve mobility abnormalities (defined by the presence of either or both): - | Restricted anterior or posterior leaflet motion in diastole | NO | 0 |
| Excessive anterior leaflet tip motion during systole | YES | 1 |
| 13 | Morphological features of the aortic  valve | Cusp thickening | NO | 0 |
| YES | 1 |
| Cusp prolapses | NO | 0 |
| YES | 1 |
| Restricted cusp motion | NO | 0 |
| YES | 1 |
| Coaptation defect in diastole | NO | 0 |
| YES | 1 |
| **STAGING OF THE RHEUMATIC HEART DISEASE** | | | | |
|  | **Stage A**: Minimal echocardiographic criteria for RHD | Presence of mild MR or AR without morphological features | NO | 0 |
| YES | 1 |
|  | Evidence of mild valvular regurgitation plus at least one morphological feature in individuals aged ≤20 years | NO | 0 |
| YES | 1 |
| Mild regurgitation in both mitral and aortic valves | NO | 0 |
| YES | 1 |
| **Stage C:** Advanced RHD at risk of clinical complications that require medical or surgical intervention | Moderate or severe MR | NO | 0 |
| YES | 1 |
| Moderate or severe AR | NO | 0 |
| YES | 1 |
| Any MS or AS | NO | 0 |
| YES | 1 |
| Pulmonary hypertension | NO | 0 |
| YES | 1 |
| Decreased LV systolic function | NO | 0 |
| YES | 1 |
| **Stage D:** Advanced RHD with clinical complications include cardiac surgery, heart failure, arrhythmia, stroke and infective endocarditis | Moderate or severe MR | NO | 0 |
| YES | 1 |
| Moderate or severe AR | NO | 0 |
| YES | 1 |
| Any MS or AS | NO | 0 |
| YES | 1 |
| Pulmonary hypertension | NO | 0 |
| YES | 1 |
| Decreased LV systolic function | NO | 0 |
| YES | 1 |
